# Supplementary material
Source: publisher site journal article supplement (https://www.dovepress.com/article/414882)
Supplement: Supplementary file 1 [file get_supplementary_file.php]

# Supporting information for:

**Defeating Melanoma Through a Nano-Enabled Revision of Hypoxic and Immunosuppressive Tumor Microenvironment**

Wenzhe Yang1,2,*, Xue Pan2,*, Peng Zhang2, Xue Yang1,2, Huashi Guan1,2, Huan Dou3, Qian Lu1,2

1Key Laboratory of Marine Drugs of Ministry of Education, School of Medicine and Pharmacy, Ocean University of China, Qingdao, Shandong Province, People’s Republic of China

2Marine Traditional Chinese Medicine R&D Laboratory, Marine Biomedical Research Institute of Qingdao, Qingdao, Shandong Province, People’s Republic of China

3Jiangsu Key Laboratory of Molecular Medicine, Medical School, Nanjing University, Nanjing, Jiangsu Province, People’s Republic of China

*These authors contributed equally.

Corresponding to author: Qian Lu, Key Laboratory of Marine Drugs of Ministry of Education, School of Medicine and Pharmacy, Ocean University of China, 5 Yushan Road, Qingdao, Shandong Province, China, Tel: +86 15850672529, Fax: +86 532 8506779, E-mail: lq7080@ouc.edu.cn; Huan Dou, Jiangsu Key Laboratory of Molecular Medicine, Medical School, Nanjing University, 22 Hankou Road, Nanjing, Jiangsu Province 210093, China, Tel: +86 13913832488, Fax: +86 025 83686441, E-mail: douhuan@nju.edu.cn

**Table S1** The encapsulation efficiency and drug loading of Ato and cabo

|  | Encapsulation efficiency | Drug loading |
| --- | --- | --- |
| Ato | 80.12% | 13.3% |
| Cabo | 82.36% | 3.4% |

**
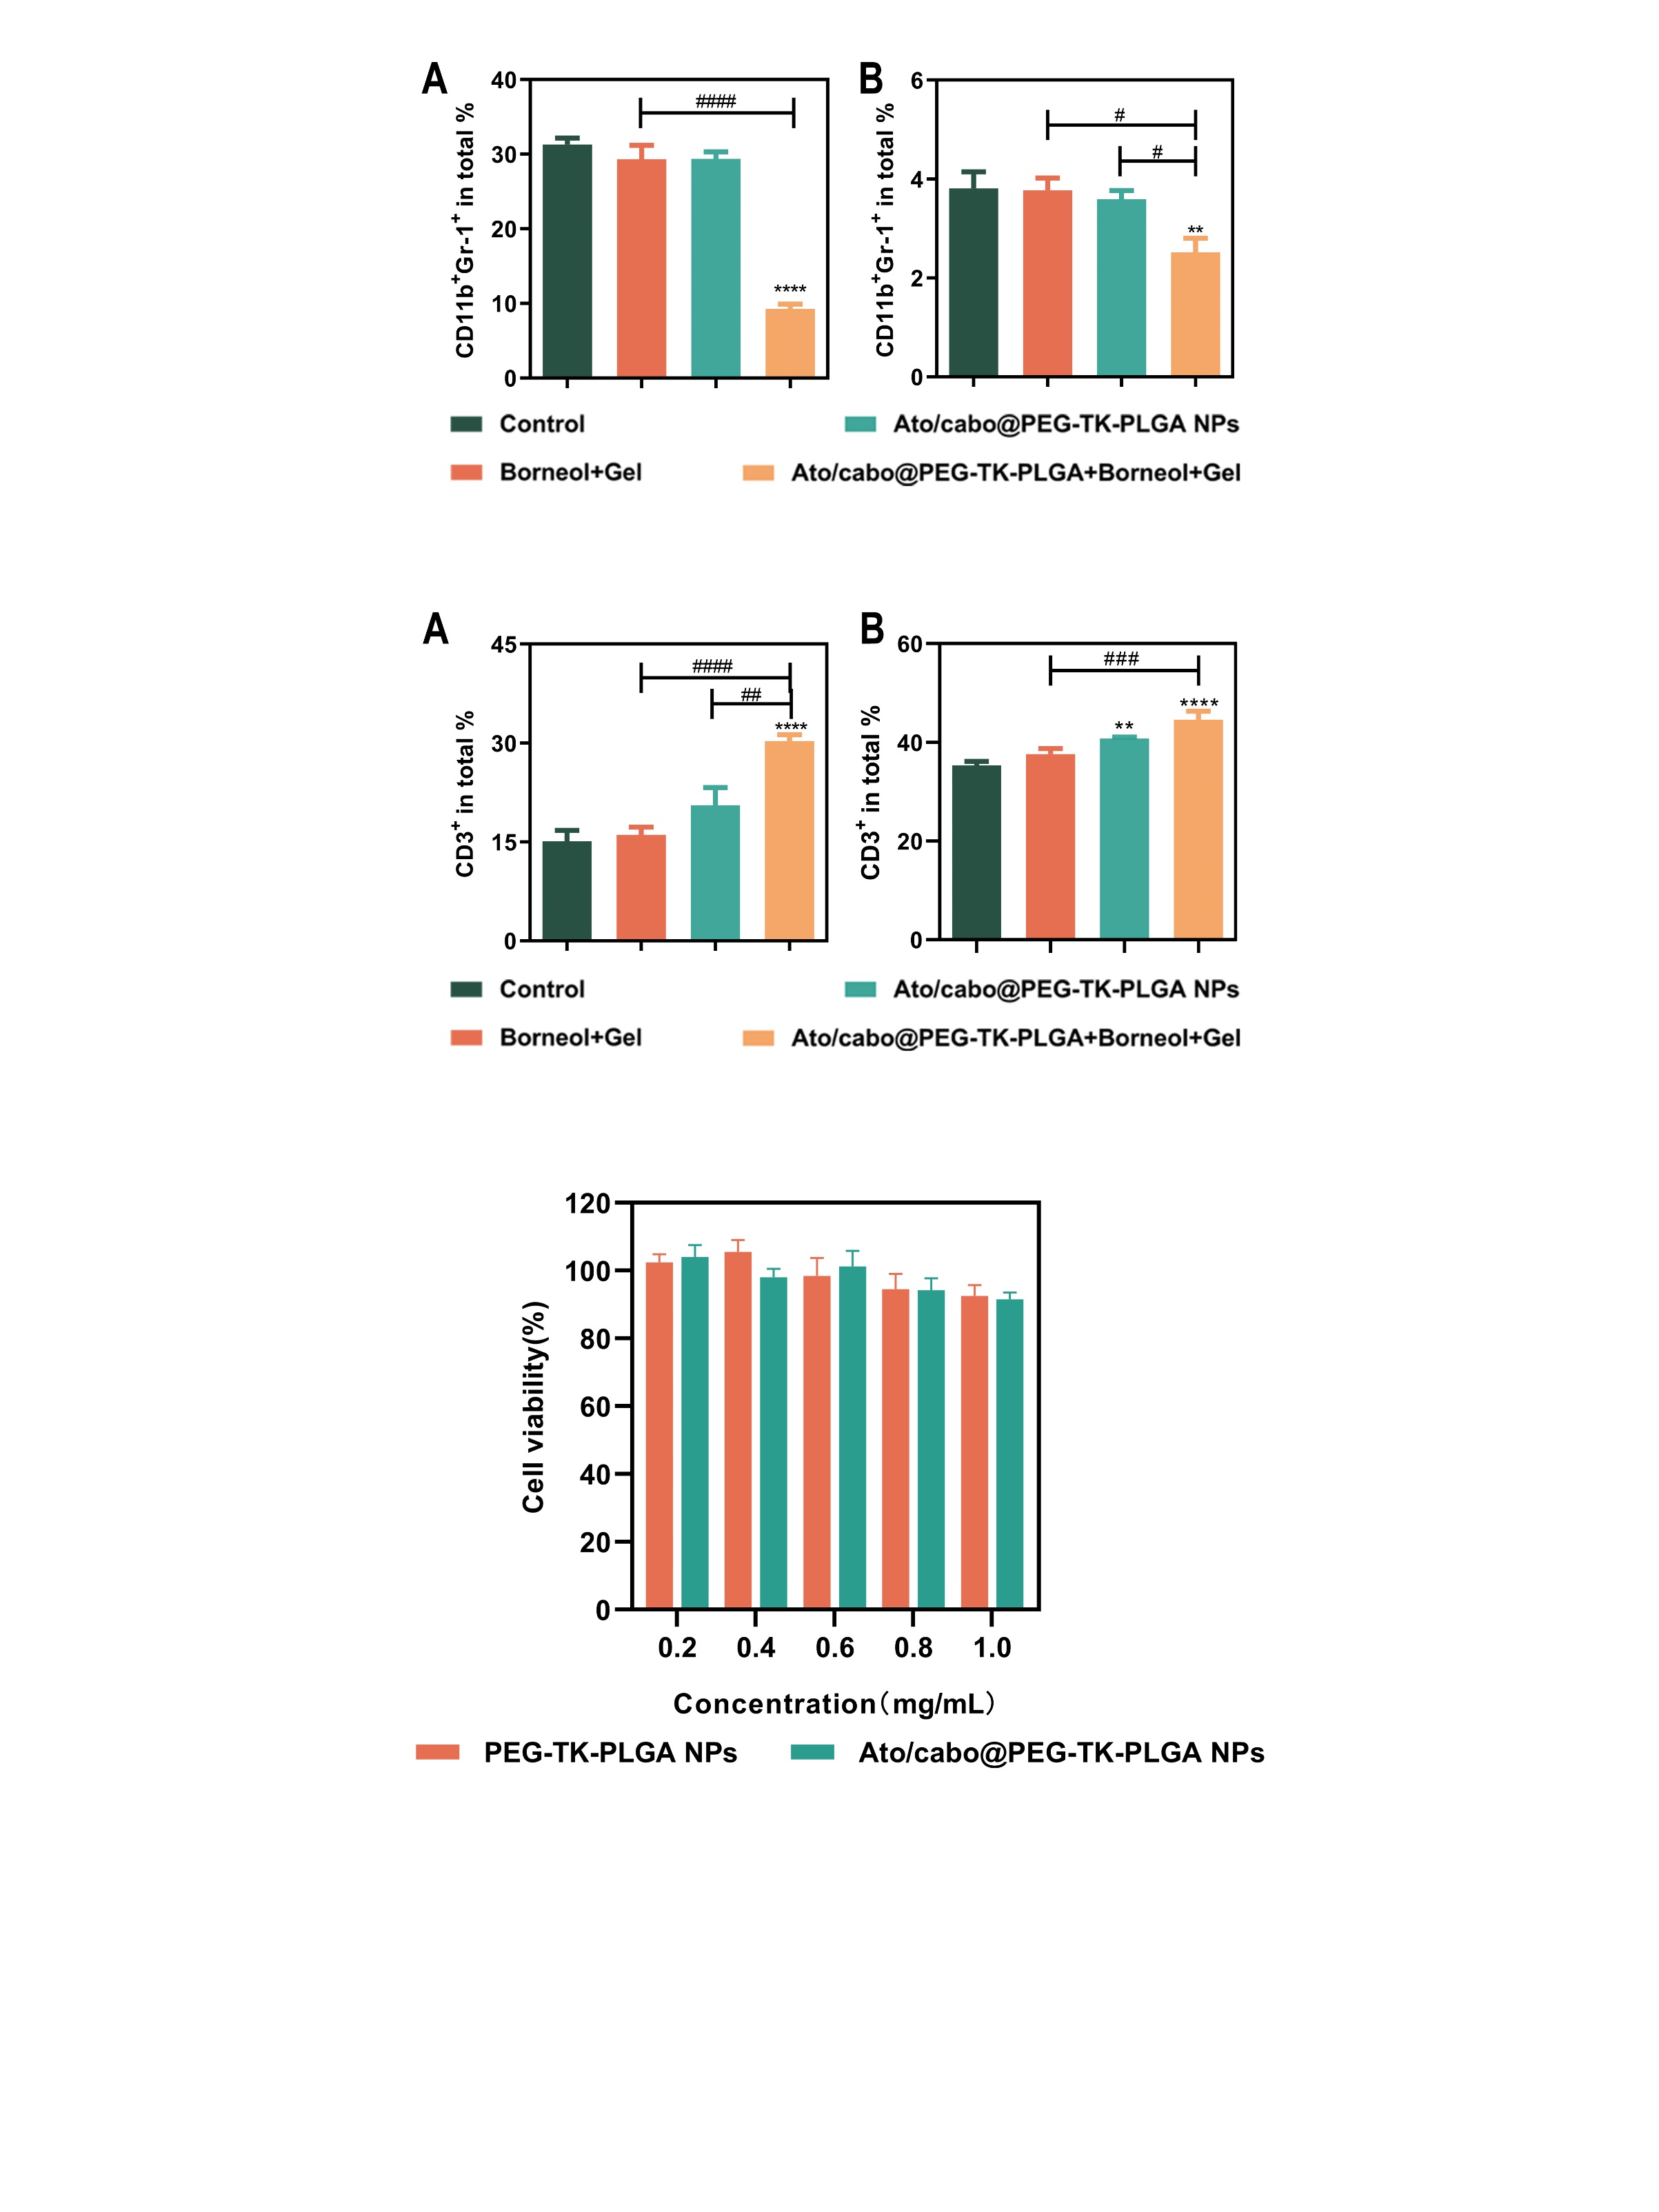
**

**Figure S1** The cell viability of PEG-TK-PLGA NPs and Ato/cabo@PEG-TK-PLGA NPs

**
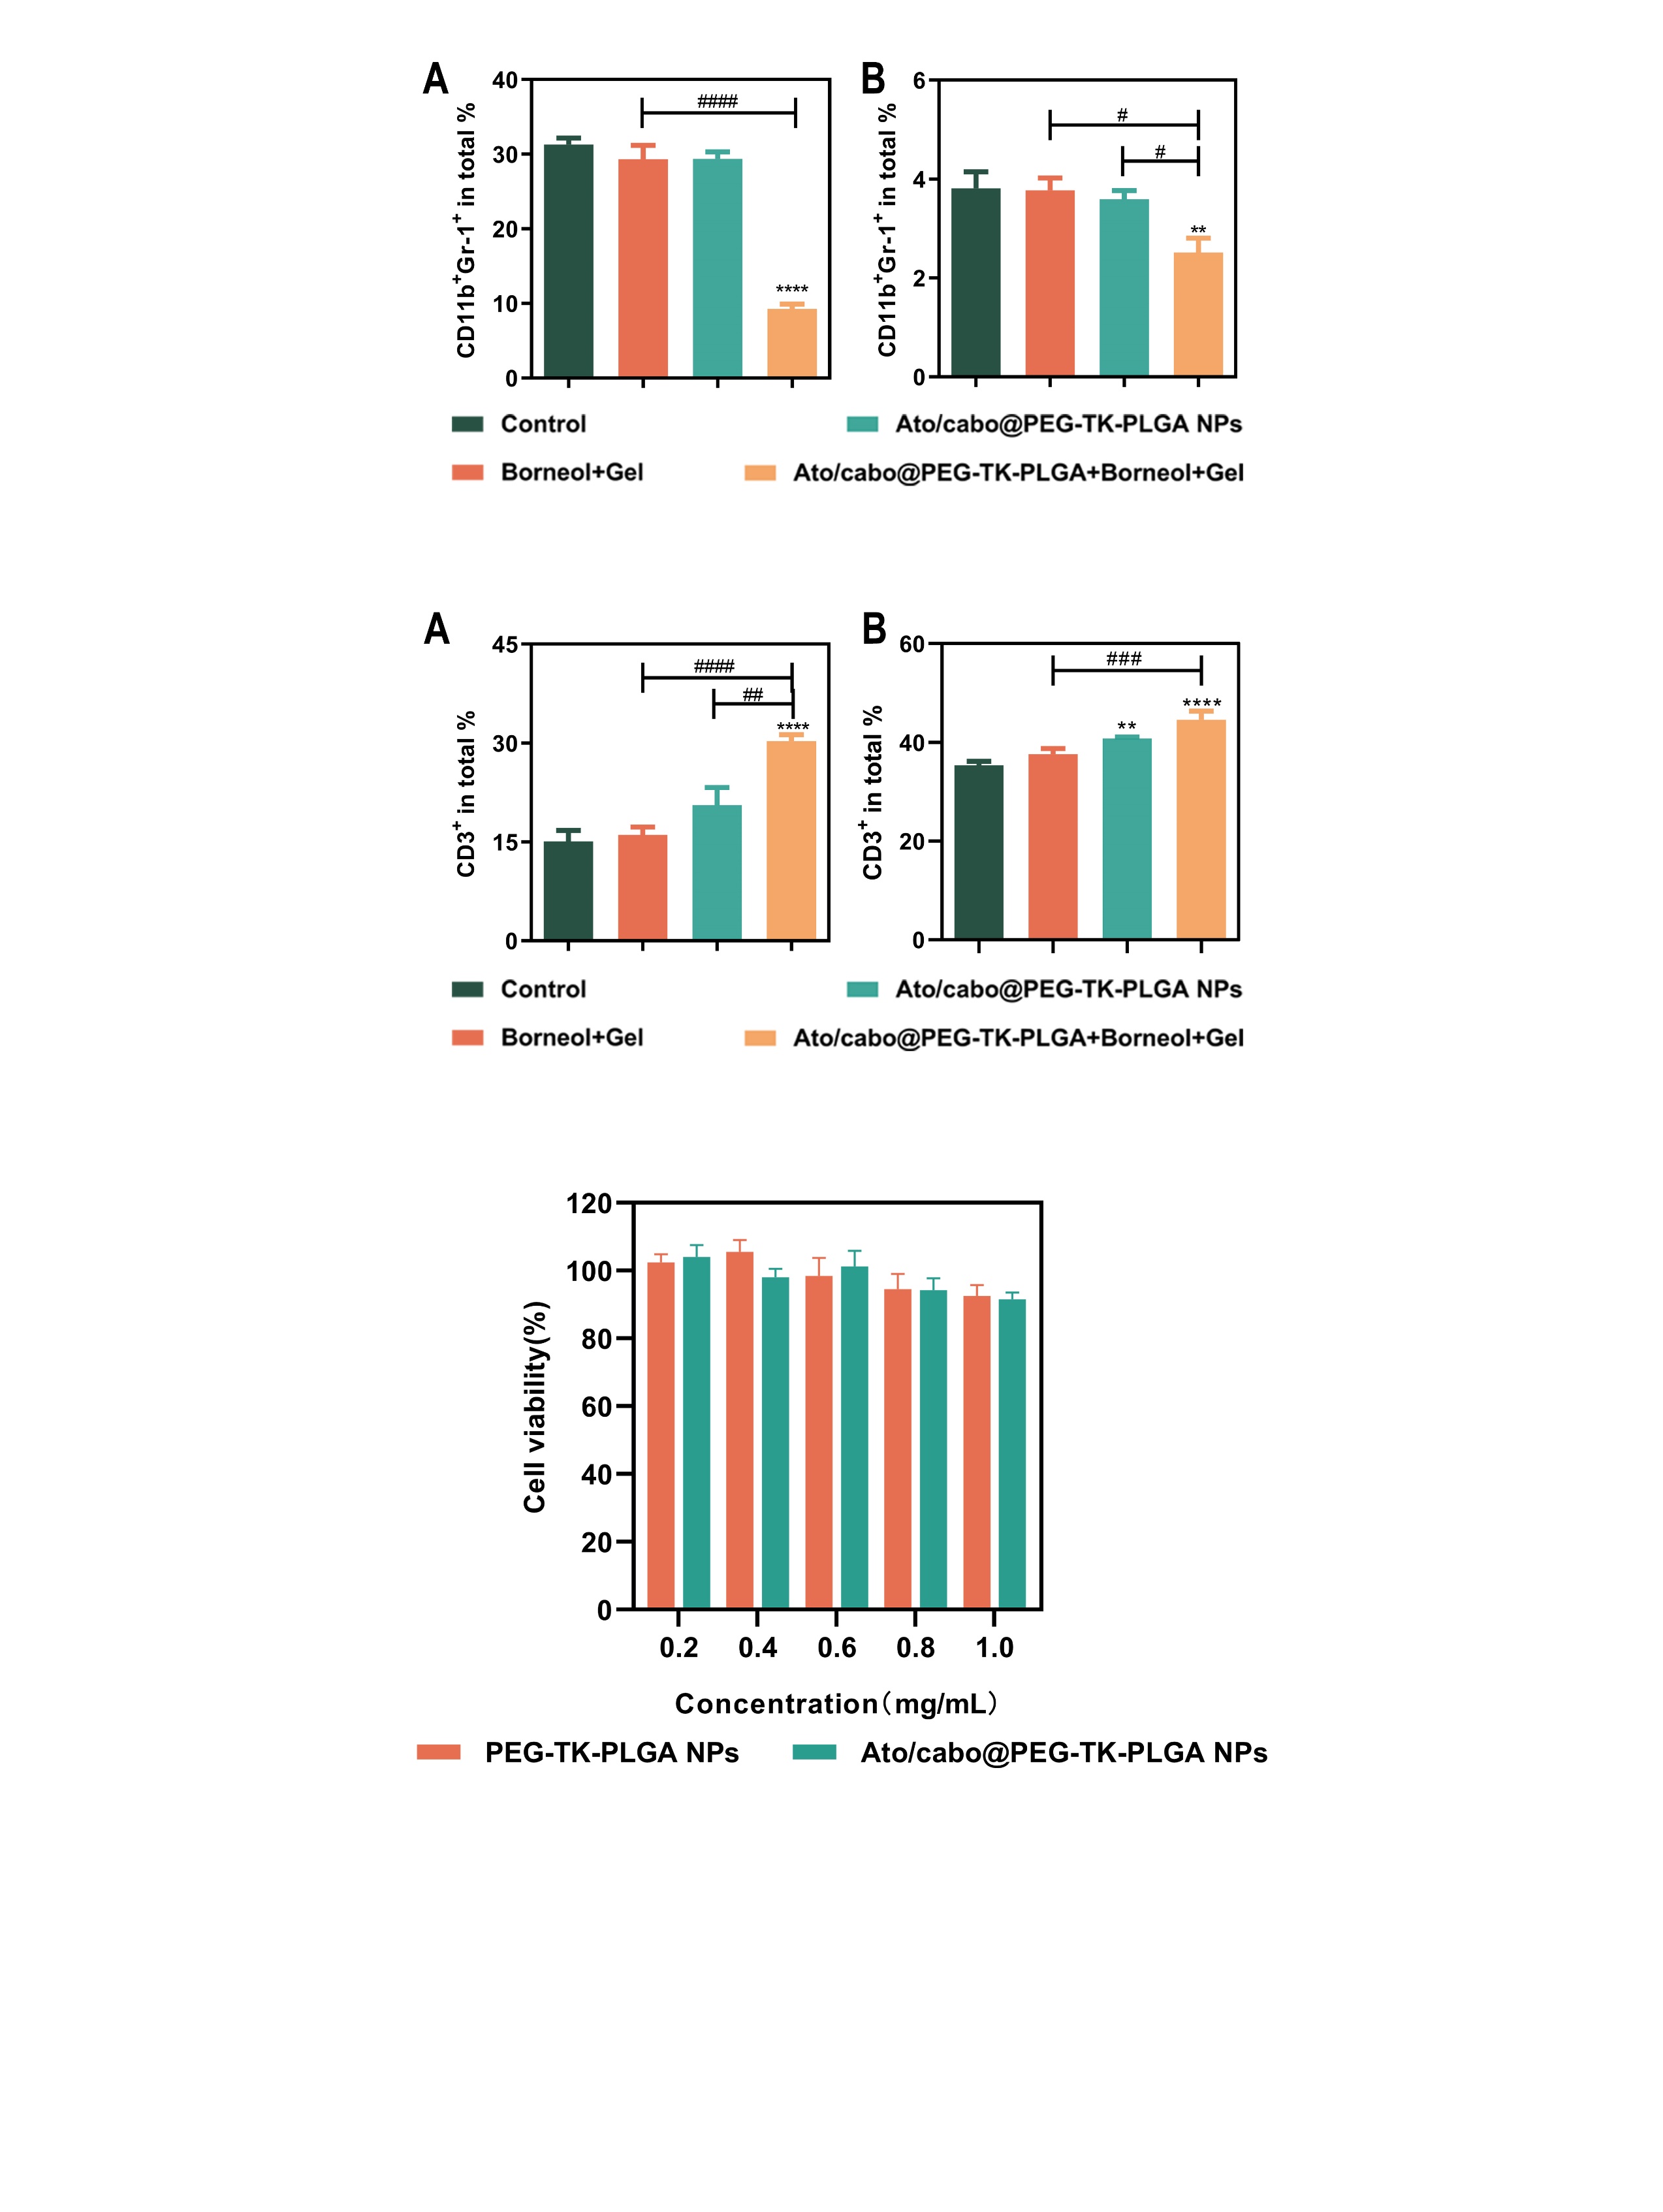
**

**Figure S2** Proportion of MDSCs with different treatment in blood (A) and spleen (B). (**P < 0.01, ****P < 0.0001 compared with control group, n = 6) (#P < 0.05, ####P < 0.0001, compared with other groups, n = 6)


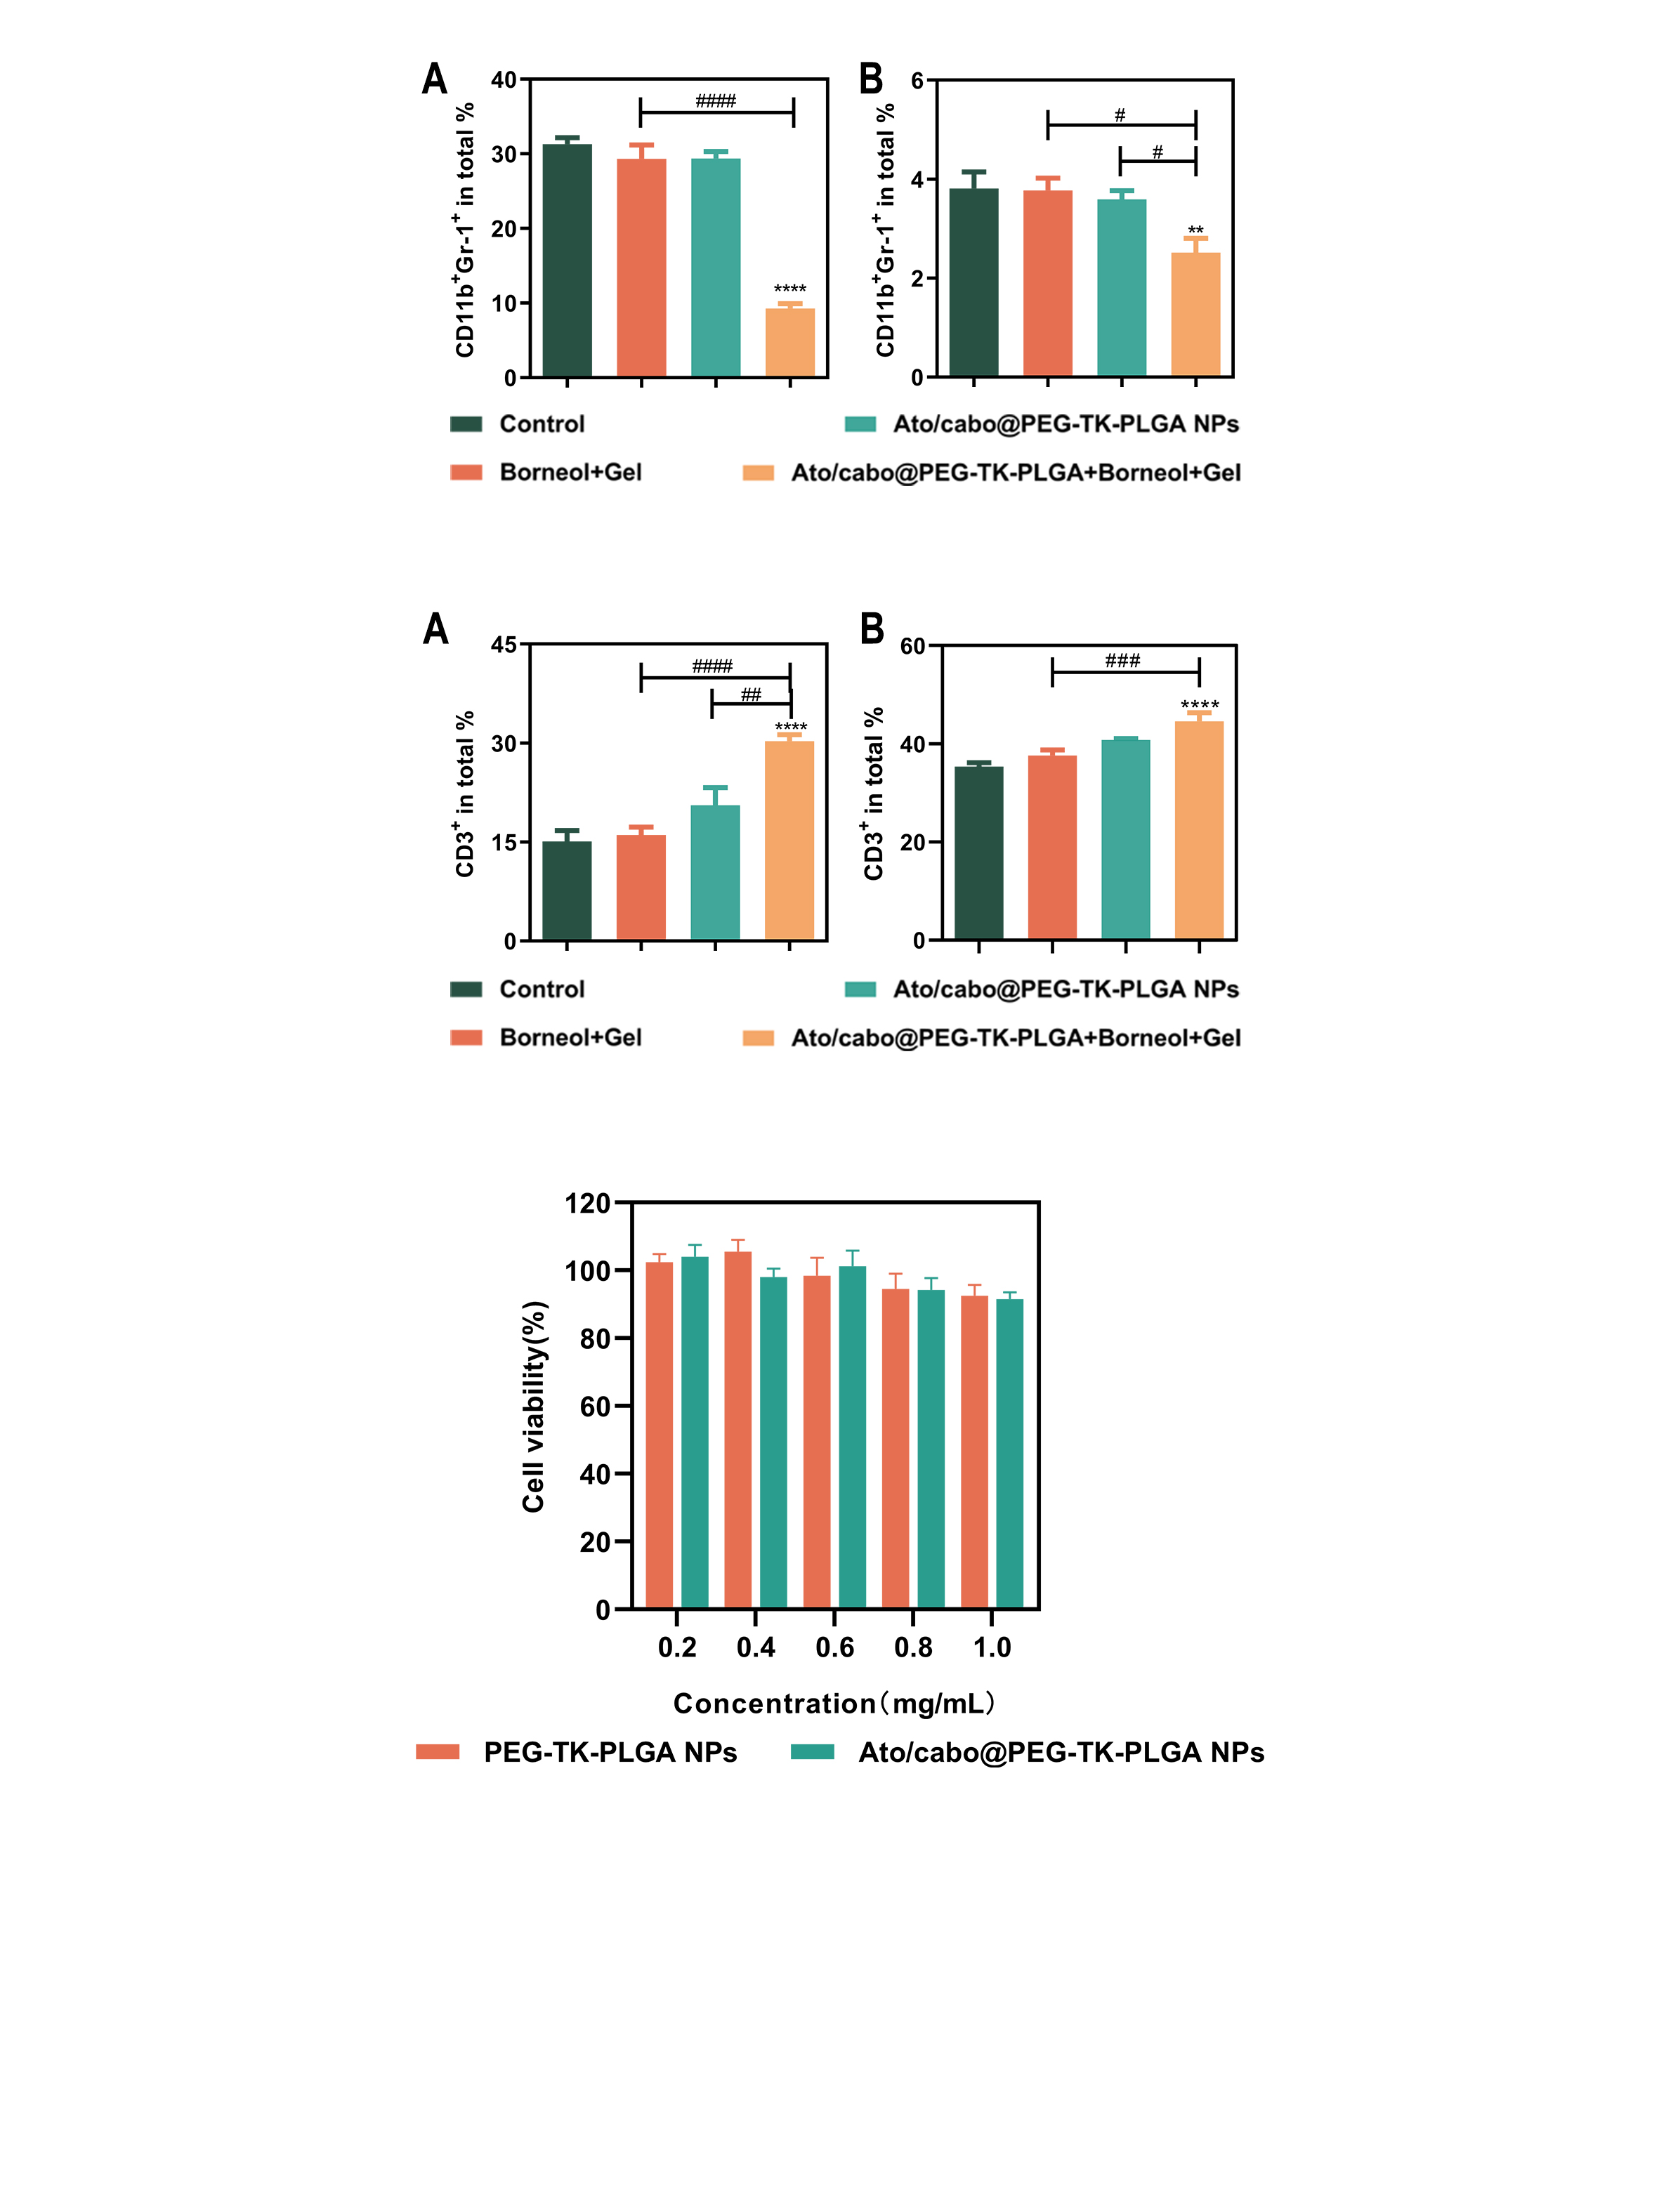


**Figure S3** The CD3+ T cells in blood (A) and spleen (B) during treatment. (****P < 0.0001 compared with control group, n = 6) (##P < 0.01, ###P < 0.001 ####P < 0.0001 compared with other groups, n = 6)


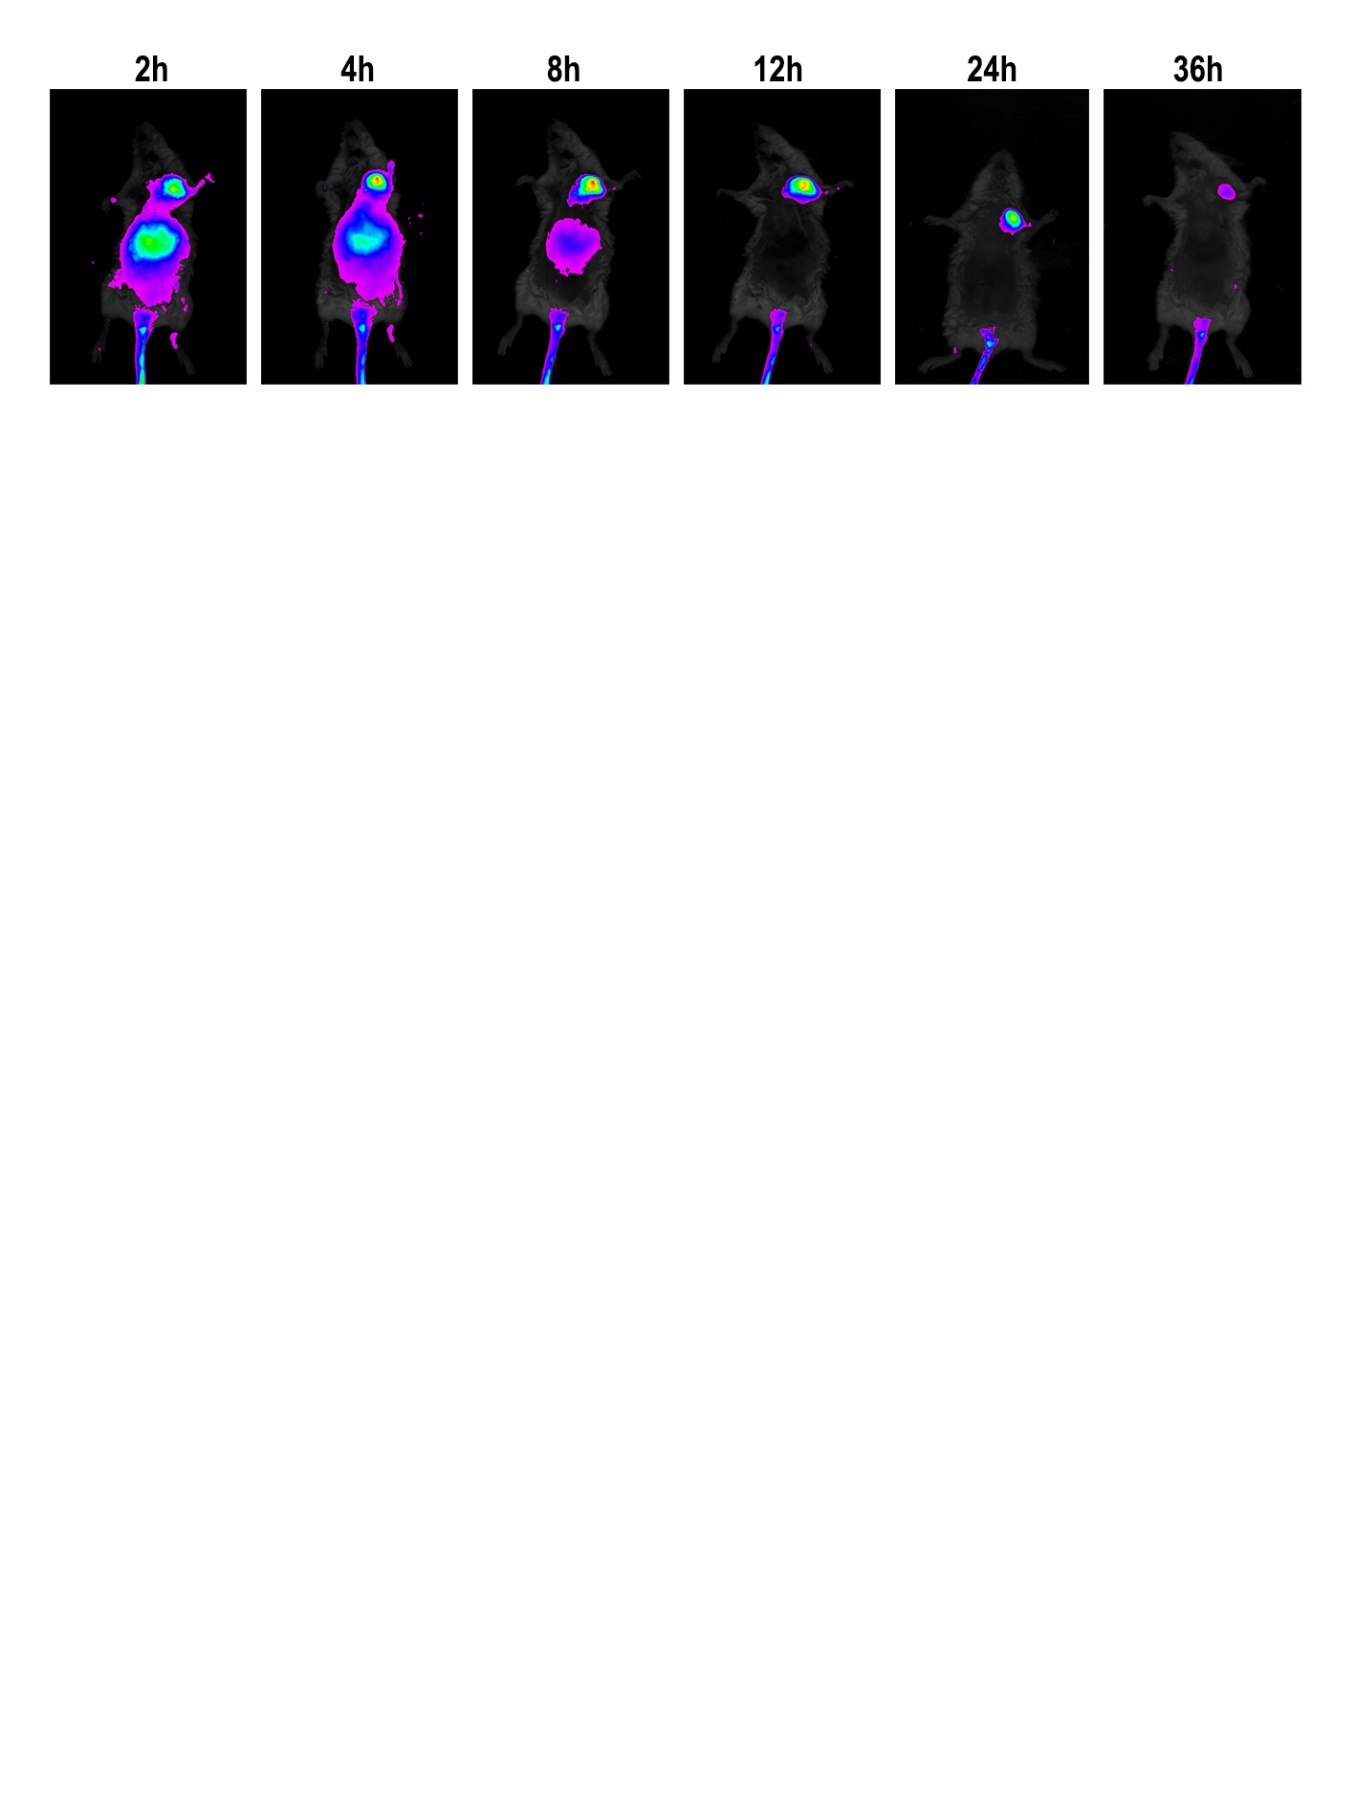


**Figure S4** Bio-distribution of ICG

**
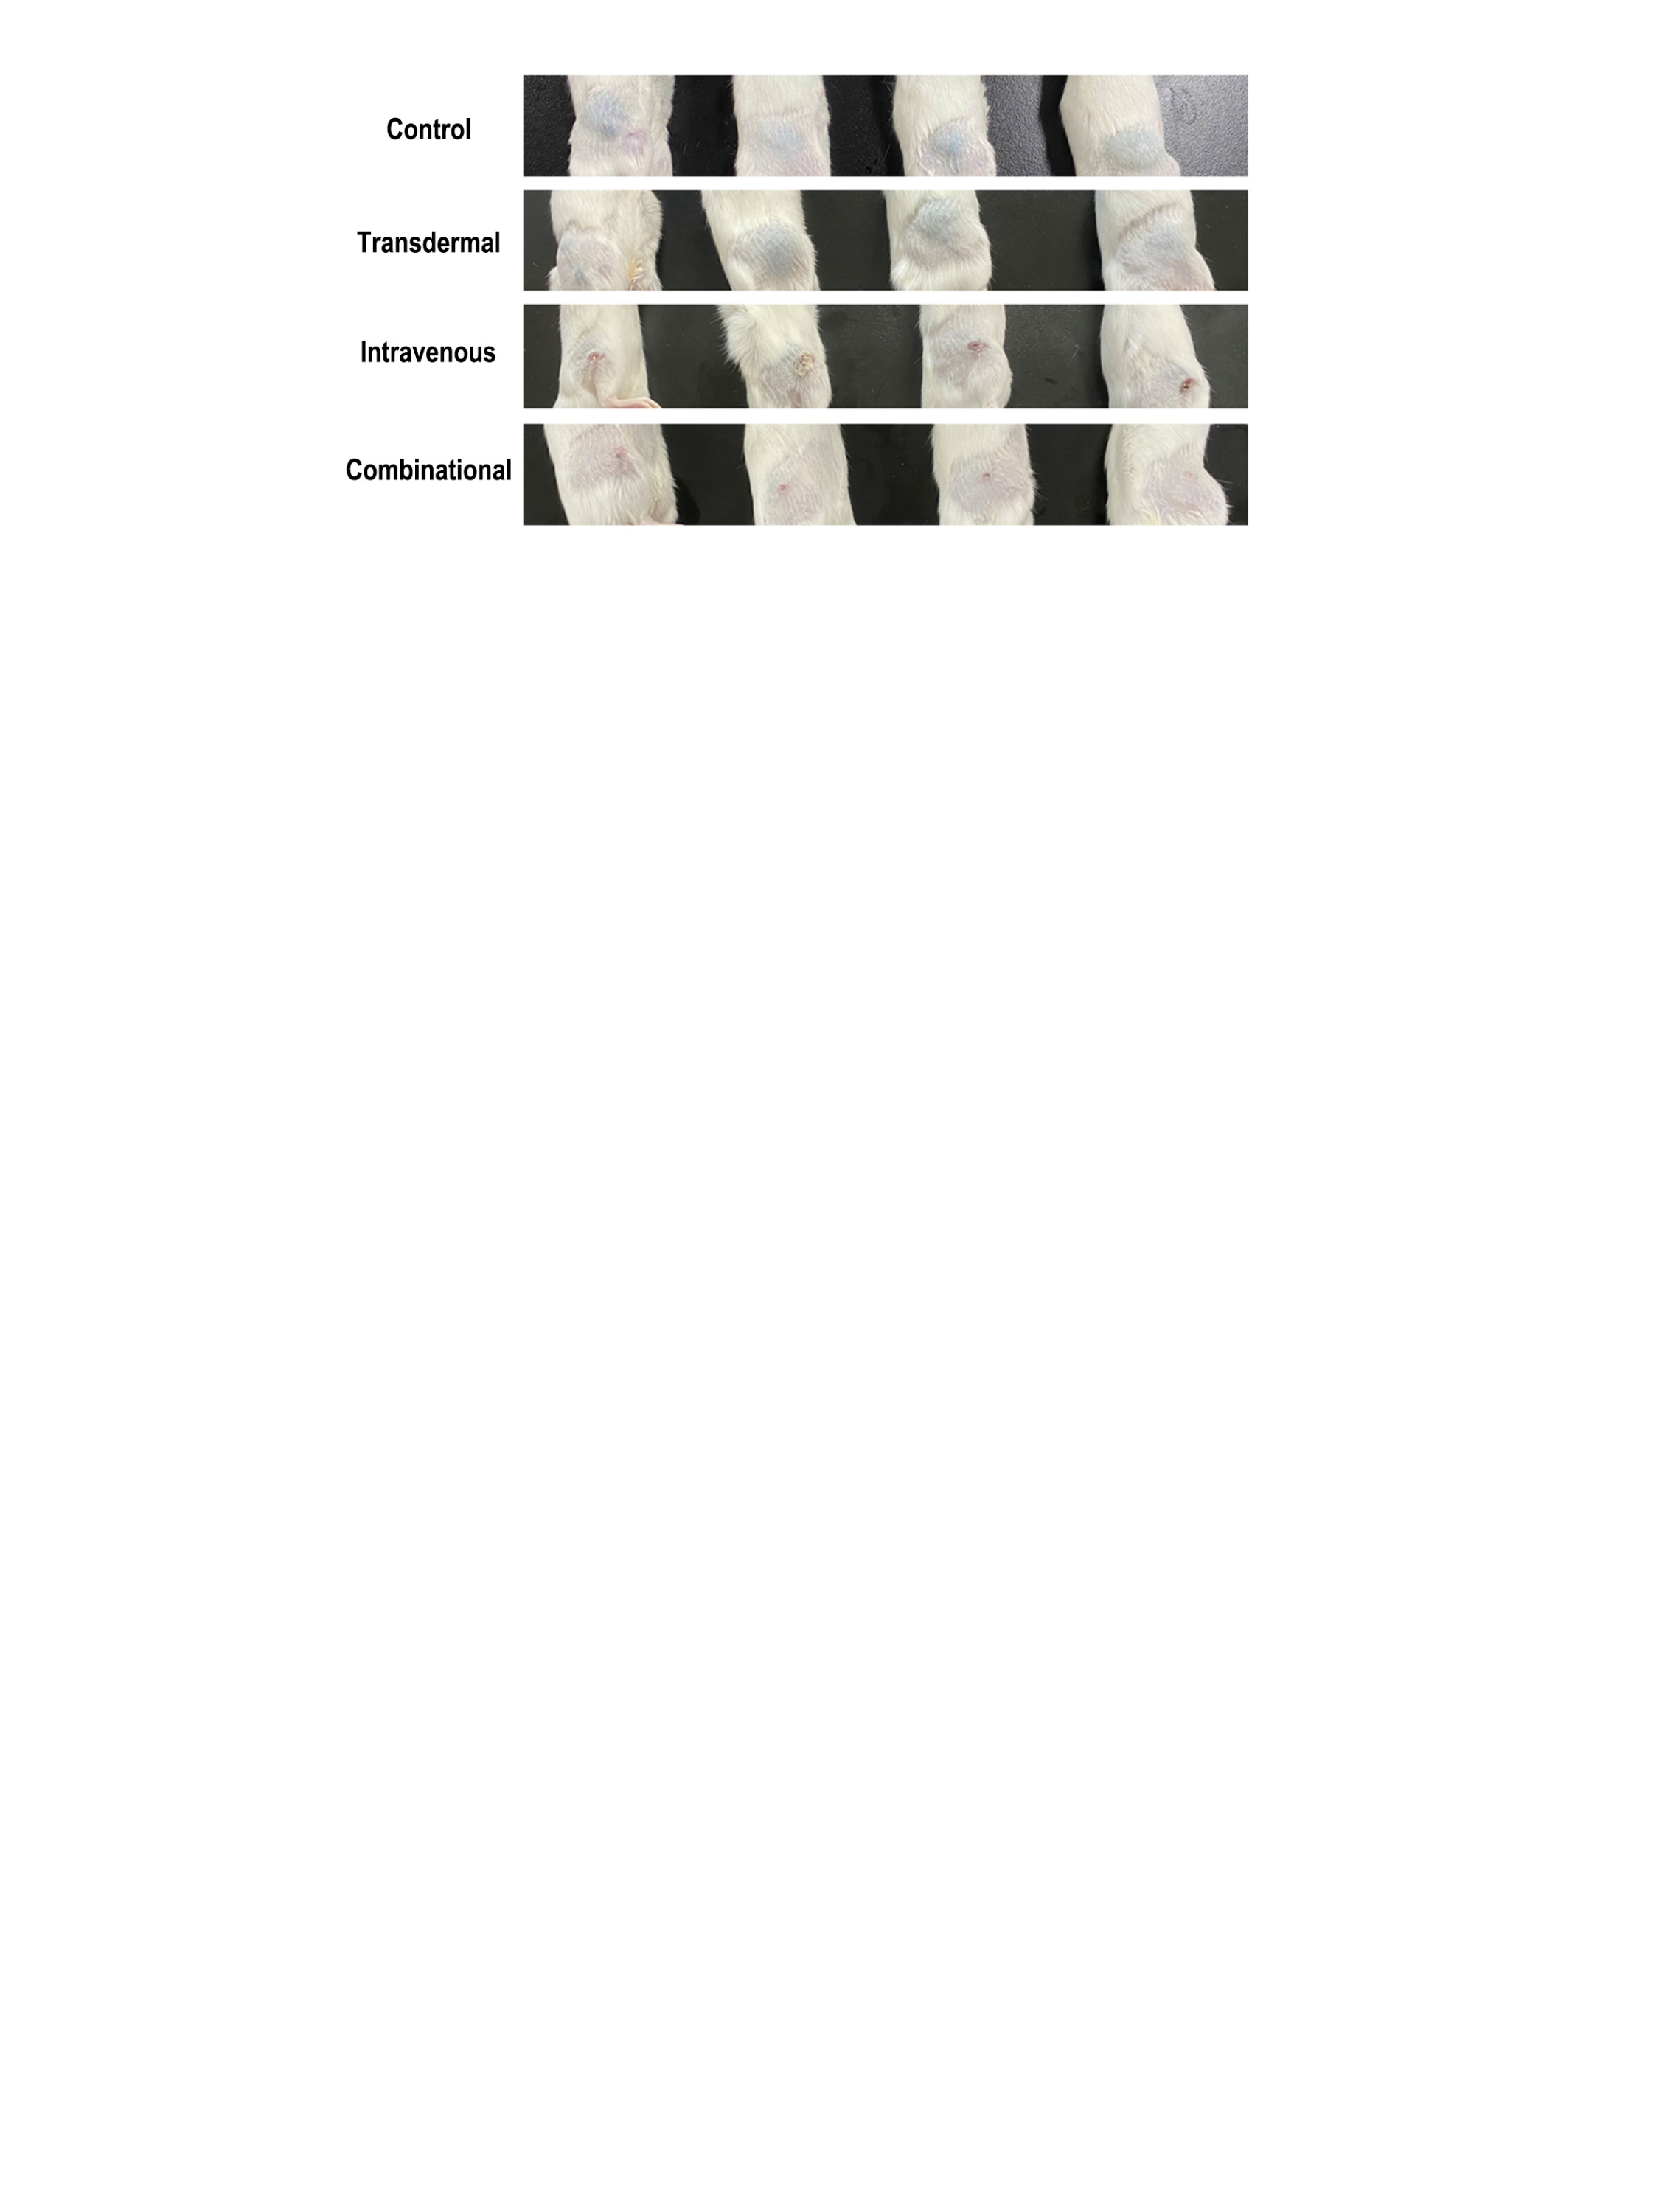
**

**Figure S5** Representative photographs of mice and tumors collected from the different groups of mice at the end of treatments

**
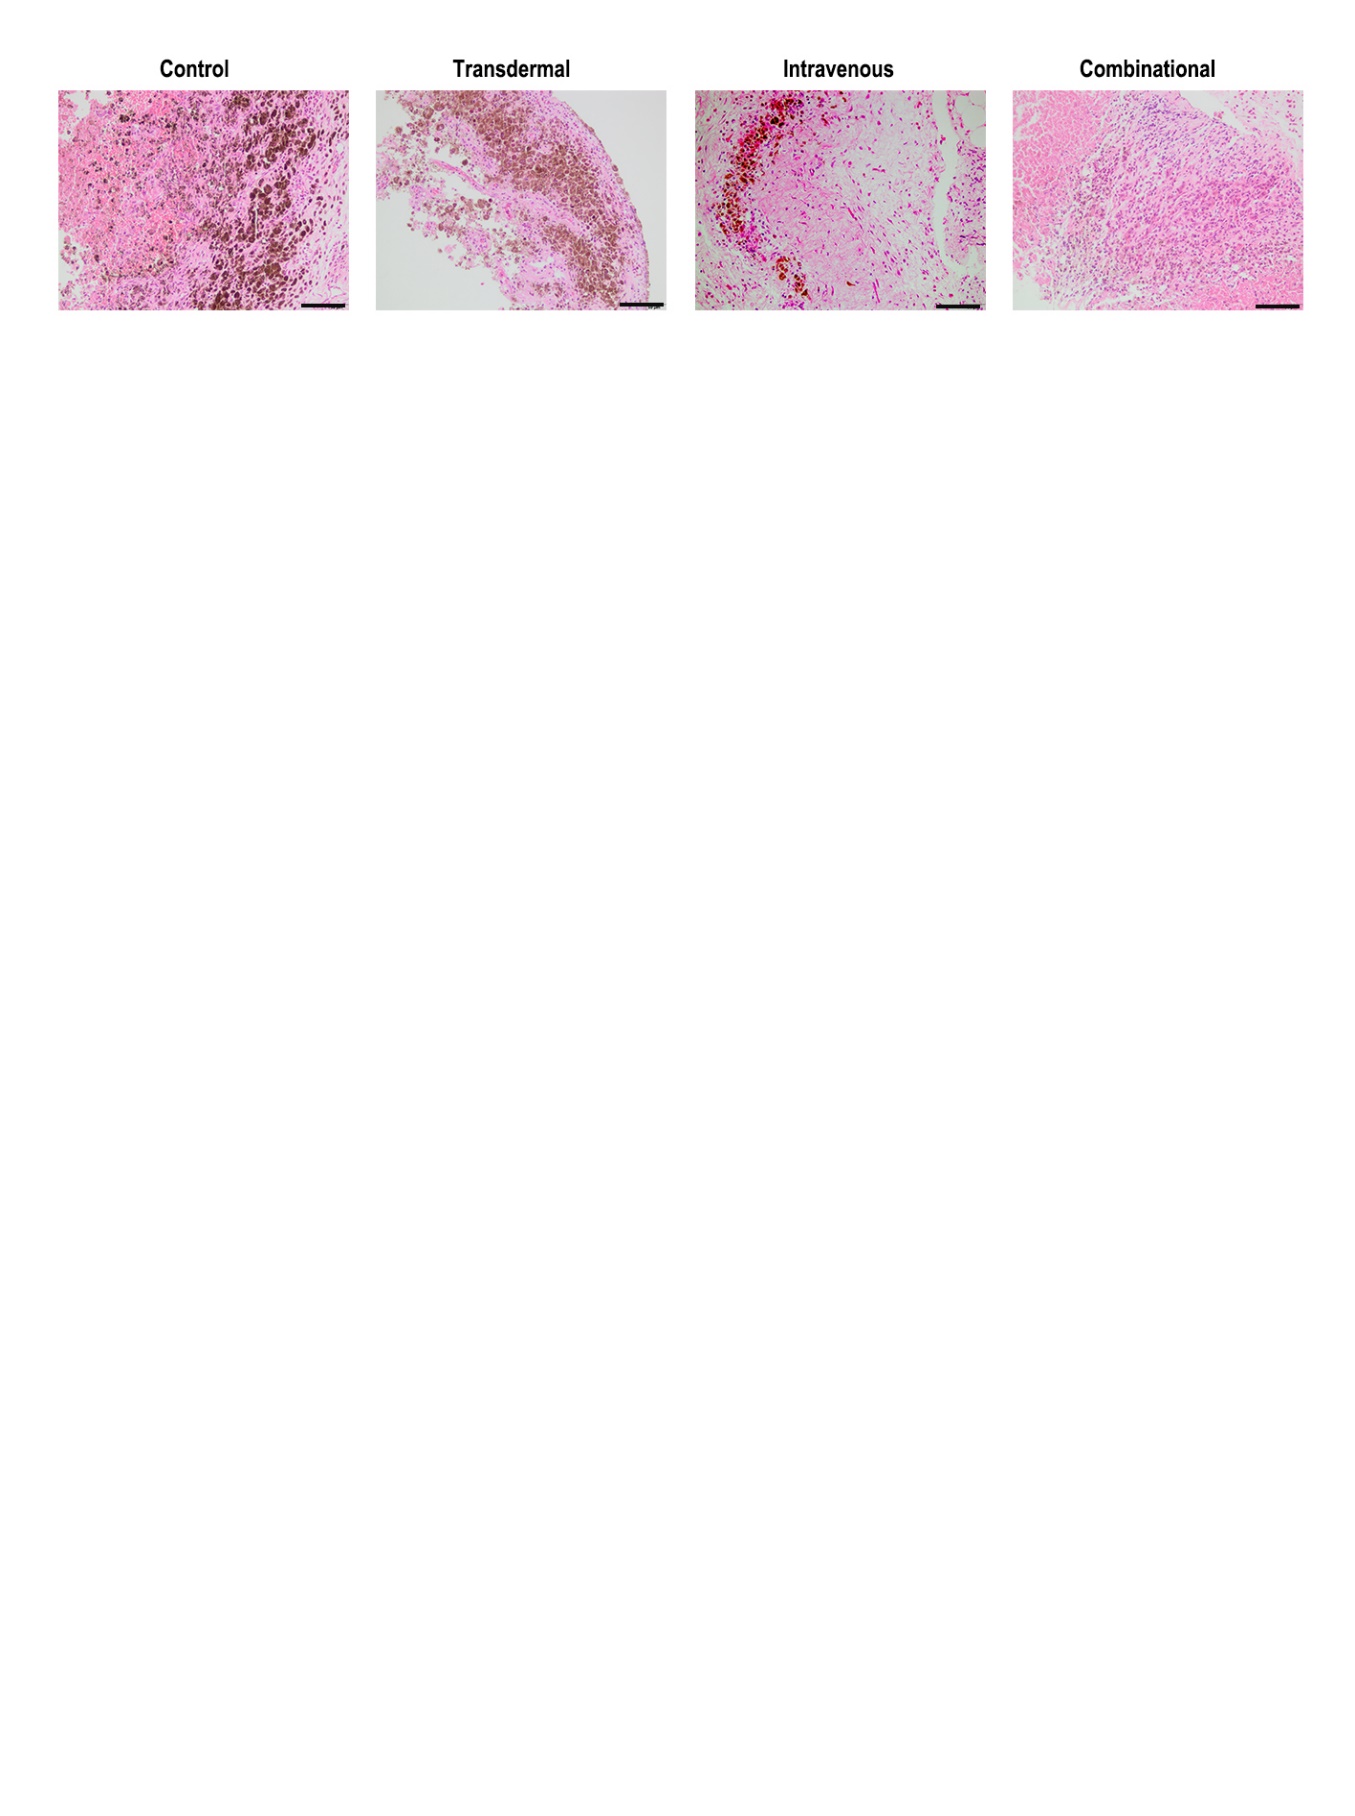
**

**Figure S6** Representative histology H&E staining of tumor slices after different treatment (Scale bars: 100 μm)
